# Supplementary material for: Potent DNA gyrase inhibitors bind asymmetrically to their target using symmetrical bifurcated halogen bonds
Source: PubMed Central journal article supplement (PMC7794245; doi:10.1038/s41467-020-20405-8), 2021-01-08
Supplement: 41467_2020_20405_MOESM9_ESM.pdf [file 41467_2020_20405_MOESM9_ESM.pdf]

## Reporting Summary

Nature Research wishes to improve the reproducibility of the work that we publish. This form provides structure for consistency and transparency in reporting. For further information on Nature Research policies, see our [Editorial Policies](#) and the [Editorial Policy Checklist](#).

### Statistics

For all statistical analyses, confirm that the following items are present in the figure legend, table legend, main text, or Methods section.

n/a Confirmed

- |                                     |                                     |                                                                                                                                                                                                                                                            |
|-------------------------------------|-------------------------------------|------------------------------------------------------------------------------------------------------------------------------------------------------------------------------------------------------------------------------------------------------------|
| <input type="checkbox"/>            | <input checked="" type="checkbox"/> | The exact sample size ( $n$ ) for each experimental group/condition, given as a discrete number and unit of measurement                                                                                                                                    |
| <input type="checkbox"/>            | <input checked="" type="checkbox"/> | A statement on whether measurements were taken from distinct samples or whether the same sample was measured repeatedly                                                                                                                                    |
| <input checked="" type="checkbox"/> | <input type="checkbox"/>            | The statistical test(s) used AND whether they are one- or two-sided<br><i>Only common tests should be described solely by name; describe more complex techniques in the Methods section.</i>                                                               |
| <input checked="" type="checkbox"/> | <input type="checkbox"/>            | A description of all covariates tested                                                                                                                                                                                                                     |
| <input checked="" type="checkbox"/> | <input type="checkbox"/>            | A description of any assumptions or corrections, such as tests of normality and adjustment for multiple comparisons                                                                                                                                        |
| <input type="checkbox"/>            | <input checked="" type="checkbox"/> | A full description of the statistical parameters including central tendency (e.g. means) or other basic estimates (e.g. regression coefficient) AND variation (e.g. standard deviation) or associated estimates of uncertainty (e.g. confidence intervals) |
| <input checked="" type="checkbox"/> | <input type="checkbox"/>            | For null hypothesis testing, the test statistic (e.g. $F$ , $t$ , $r$ ) with confidence intervals, effect sizes, degrees of freedom and $P$ value noted<br><i>Give <math>P</math> values as exact values whenever suitable.</i>                            |
| <input checked="" type="checkbox"/> | <input type="checkbox"/>            | For Bayesian analysis, information on the choice of priors and Markov chain Monte Carlo settings                                                                                                                                                           |
| <input checked="" type="checkbox"/> | <input type="checkbox"/>            | For hierarchical and complex designs, identification of the appropriate level for tests and full reporting of outcomes                                                                                                                                     |
| <input checked="" type="checkbox"/> | <input type="checkbox"/>            | Estimates of effect sizes (e.g. Cohen's $d$ , Pearson's $r$ ), indicating how they were calculated                                                                                                                                                         |

*Our web collection on [statistics for biologists](#) contains articles on many of the points above.*

### Software and code

Policy information about [availability of computer code](#)

|                 |                                                                                                                                                                                                                                                                                                                           |
|-----------------|---------------------------------------------------------------------------------------------------------------------------------------------------------------------------------------------------------------------------------------------------------------------------------------------------------------------------|
| Data collection | Cambridge Structure Database (CSD) 2020.1                                                                                                                                                                                                                                                                                 |
| Data analysis   | ChemDraw Professional 15.0.0.106, UCSF ChimeraX 0.91, GraphPad Prism 6.0 and 7.0, Pymol 2.0.4, MarvinSketch 20.17., Discovery Studio 4.1, Pipeline Pilot 9.2, LigandScout 3.12, ConQuest 2020.1.1, Mercury version 2020.1. CPPTRAJ: Trajectory Analysis. V18.01 (AmberTools V18), VMD v1.9.3, GNU PLOT v4.6, SigmaPlot 13 |

For manuscripts utilizing custom algorithms or software that are central to the research but not yet described in published literature, software must be made available to editors and reviewers. We strongly encourage code deposition in a community repository (e.g. GitHub). See the Nature Research [guidelines for submitting code & software](#) for further information.

### Data

Policy information about [availability of data](#)

All manuscripts must include a [data availability statement](#). This statement should provide the following information, where applicable:

- Accession codes, unique identifiers, or web links for publicly available datasets
- A list of figures that have associated raw data
- A description of any restrictions on data availability

Model coordinates and density maps are available in the Protein Data Bank (PDB ID 6Z1A, <https://www.rcsb.org/structure/6Z1A>). Crystal structures used within small molecule database search are publicly available in the Cambridge Structural Database repository (<https://www.ccdc.cam.ac.uk/structures/>), using crystal structure identifiers listed in Supplementary information. Crystal structures used within pdb database search are publicly available in Protein Data Bank repository (PDB IDs: 2XCS (<https://www.rcsb.org/structure/2XCS>), 5CDP (<https://www.rcsb.org/structure/5CDP>), 1GJD (<https://www.rcsb.org/structure/1GJD>), 1UHI (<https://www.rcsb.org/structure/1UHI>), 4CMJ (<https://www.rcsb.org/structure/4CMJ>), 4JYI (<https://www.rcsb.org/structure/4JYI>), 5A86 (<https://www.rcsb.org/structure/5A86>), 5YC6 (<https://www.rcsb.org/structure/5YC6>), 5YC7 (<https://www.rcsb.org/structure/5YC7>)). The source data of Fig. 3a are provided as a Source

Data file. Other data that support the findings of this study are available from the corresponding author upon reasonable request.

## Field-specific reporting

Please select the one below that is the best fit for your research. If you are not sure, read the appropriate sections before making your selection.

Life sciences     Behavioural & social sciences     Ecological, evolutionary & environmental sciences

For a reference copy of the document with all sections, see [nature.com/documents/nr-reporting-summary-flat.pdf](https://www.nature.com/documents/nr-reporting-summary-flat.pdf)

## Life sciences study design

All studies must disclose on these points even when the disclosure is negative.

|                 |                                                                                                                                                                                                                                                                                                                                                                                                                                                               |
|-----------------|---------------------------------------------------------------------------------------------------------------------------------------------------------------------------------------------------------------------------------------------------------------------------------------------------------------------------------------------------------------------------------------------------------------------------------------------------------------|
| Sample size     | No sample-size calculation was performed. The sample size of 3 was considered sufficient due to the low variability of these measurements when done with the same enzyme preparation. The number of biological repeats (2-4) was chosen taking into account the fundamental principles to show experiments repeatability ( <a href="https://www.embopress.org/doi/full/10.1038/embor.2012.36">https://www.embopress.org/doi/full/10.1038/embor.2012.36</a> ). |
| Data exclusions | No data were excluded.                                                                                                                                                                                                                                                                                                                                                                                                                                        |
| Replication     | All assays were performed two to four times under the same conditions to verify reproducibility, which was successfully confirmed.                                                                                                                                                                                                                                                                                                                            |
| Randomization   | This was not relevant for our study, because we did not perform experiments that would include experimental groups.                                                                                                                                                                                                                                                                                                                                           |
| Blinding        | This was not relevant for our study, because we did not have group allocation.                                                                                                                                                                                                                                                                                                                                                                                |

## Reporting for specific materials, systems and methods

We require information from authors about some types of materials, experimental systems and methods used in many studies. Here, indicate whether each material, system or method listed is relevant to your study. If you are not sure if a list item applies to your research, read the appropriate section before selecting a response.

### Materials & experimental systems

| n/a                                 | Involvement in the study                                  |
|-------------------------------------|-----------------------------------------------------------|
| <input checked="" type="checkbox"/> | <input type="checkbox"/> Antibodies                       |
| <input type="checkbox"/>            | <input checked="" type="checkbox"/> Eukaryotic cell lines |
| <input checked="" type="checkbox"/> | <input type="checkbox"/> Palaeontology and archaeology    |
| <input checked="" type="checkbox"/> | <input type="checkbox"/> Animals and other organisms      |
| <input checked="" type="checkbox"/> | <input type="checkbox"/> Human research participants      |
| <input checked="" type="checkbox"/> | <input type="checkbox"/> Clinical data                    |
| <input checked="" type="checkbox"/> | <input type="checkbox"/> Dual use research of concern     |

### Methods

| n/a                                 | Involvement in the study                        |
|-------------------------------------|-------------------------------------------------|
| <input checked="" type="checkbox"/> | <input type="checkbox"/> ChIP-seq               |
| <input checked="" type="checkbox"/> | <input type="checkbox"/> Flow cytometry         |
| <input checked="" type="checkbox"/> | <input type="checkbox"/> MRI-based neuroimaging |

## Eukaryotic cell lines

Policy information about [cell lines](#)

|                                                                      |                                                              |
|----------------------------------------------------------------------|--------------------------------------------------------------|
| Cell line source(s)                                                  | Hep G2 (ATCC® HB-8065™); HUVEC (ATCC® CRL-1730™)             |
| Authentication                                                       | None of the cell lines used were authenticated.              |
| Mycoplasma contamination                                             | The cell lines were not tested for mycoplasma contamination. |
| Commonly misidentified lines<br>(See <a href="#">ICLAC</a> register) | /                                                            |
